# Supplementary material
Source: publisher site journal article supplement (https://www.spandidos-publications.com/7051/downloadSupplementary)
Supplement: Supplementary file 1 [file downloadSupplementary]

## Sheet: 2370 target genes
Table SIII. Potential target genes for PAXIP1.
Target genes	Mean binding score of PAXIP1	Binding score in SRX3230395 (HepG2 cells)
NPAS4	2138	2138
ABCC6	1663	1663
XKR7	1536	1536
AGMAT	1451	1451
IQSEC3	1364	1364
PLEKHG6	1304	1304
NGEF	1210	1210
CFB	1209	1209
AJUBA	1207	1207
HTR5A	1195	1195
HNF1A	1175	1175
NR0B2	1153	1153
NRL	1140	1140
DCAF11	1140	1140
C4BPB	1112	1112
CLIC1	1086	1086
F2	1060	1060
PCGF5	1035	1035
FGFR4	1013	1013
SPATA2	995	995
CX3CL1	969	969
WDR74	968	968
HAAO	960	960
RNF213	949	949
ASGR2	949	949
TCIRG1	945	945
FYB2	942	942
AGT	908	908
LOC110384692	903	903
GLTPD2	903	903
C4B	903	903
C4B_2	903	903
C4A	903	903
AHCY	903	903
VAMP5	901	901
NRSN2	884	884
PKP4	881	881
ORM1	874	874
MTRNR2L2	873	873
F7	853	853
ORM2	840	840
NEURL2	837	837
CTSA	837	837
RSPH14	822	822
SLC45A4	816	816
CCDC200	809	809
PROZ	808	808
RAB37	807	807
RPP40	804	804
IL7	804	804
SEPTIN9	797	797
STN1	789	789
HPN	784	784
LCAT	780	780
TATDN3	774	774
NSL1	774	774
SHISA5	773	773
MMP15	772	772
ATP7B	772	772
ALG11	772	772
ETV4	771	771
MYADM	761	761
PUS10	756	756
PEX13	756	756
CPLX2	751	751
ST6GALNAC6	750	750
RBMS1	748	748
GLRA1	744	744
DGKD	743	743
KRTAP2-3	732	732
ZNF219	728	728
GPT	720	720
APOA1	717	717
APOC3	715	715
CELSR3	710	710
QPRT	698	698
RRAS	696	696
APOB	695	695
CDKN2AIP	694	694
TMBIM1	693	693
CYP4F12	692	692
MIA2	687	687
HPR	686	686
PYGL	670	670
UBA5	665	665
SLC22A9	662	662
AKR1C4	660	660
IL1RN	653	653
CA5A	650	650
STAT5B	647	647
PVALEF	638	638
EPHA10	638	638
AATK	638	638
ARG1	630	630
AKAP1	626	626
PCYT2	622	622
PACSIN3	622	622
SLC39A5	620	620
SLC2A14	620	620
AHSG	616	616
KRT8	615	615
ASGR1	612	612
CCR6	611	611
PGPEP1	610	610
SMG5	607	607
LARP1	605	605
ANKS4B	602	602
IGFALS	601	601
BHLHE40	601	601
L1CAM	597	597
STAT3	596	596
MTRNR2L8	592	592
C8A	592	592
SEC14L4	589	589
NFKBIA	589	589
LCK	588	588
DOK4	587	587
IRF2BPL	586	586
ZNF444	585	585
FAM102A	571	571
UGT2B10	567	567
HNMT	567	567
C2	567	567
APOA2	567	567
AMACR	562	562
RNASEH1	561	561
SMYD5	558	558
LEAP2	557	557
DAGLB	555	555
ARSB	553	553
GNG4	541	541
TRIB1	540	540
CRK	540	540
ADAP1	540	540
POLR2H	539	539
NEK2	538	538
DNMT3A	538	538
ZBTB38	534	534
RMND5A	534	534
SNX7	532	532
FUT5	532	532
SERPINA10	531	531
MOGAT3	522	522
SLC25A10	521	521
TJAP1	520	520
IQCN	520	520
ERF	520	520
DUSP9	514	514
RCL1	510	510
CLYBL	510	510
CYB5R4	506	506
CBS	505	505
VIL1	504	504
CSRNP1	503	503
CD68	503	503
CLDN14	499	499
A1BG	499	499
CHGB	497	497
KAZALD1	493	493
SULT1A4	492	492
SULT1A3	492	492
PLIN2	490	490
TFR2	487	487
PLXNB1	484	484
IGDCC3	480	480
SERPINF1	479	479
KIFC3	479	479
PRR5	478	478
ACOX2	478	478
GAMT	477	477
HYAL2	475	475
COMT	471	471
TRNP1	469	469
VTN	462	462
SARM1	462	462
SARDH	461	461
PLPPR1	459	459
ISOC1	455	455
DONSON	454	454
APOM	453	453
CDC14B	452	452
TTC31	440	440
FAT4	438	438
EXOC3L4	437	437
DSP	436	436
YAP1	435	435
SLC11A2	434	434
CYBA	434	434
MAPKAPK3	433	433
CISH	433	433
CAMK2N1	433	433
MAMSTR	432	432
C1GALT1	431	431
NFE2	428	428
HSD17B11	428	428
GAS2	428	428
CCL20	428	428
MTRNR2L9	426	426
APOH	425	425
OBSL1	424	424
INHA	424	424
HPCAL1	424	424
APOL1	424	424
SUCLA2	423	423
PKLR	423	423
ABI2	423	423
CBY3	422	422
ANXA9	422	422
JAK3	420	420
INAVA	420	420
MAPK8IP2	418	418
RNASET2	417	417
RHBDD1	417	417
ZCCHC3	415	415
F13B	415	415
MC1R	414	414
LOC100129484	413	413
UTP14C	411	411
NCOA2	411	411
SCRT1	406	406
SRARP	405	405
BHLHA15	405	405
EFNA1	404	404
PIM1	402	402
TM4SF5	401	401
FGL1	401	401
KIF21A	400	400
BARHL1	400	400
NFATC3	399	399
SLC51B	398	398
NQO2	398	398
HNRNPD	398	398
SHFL	397	397
NKD1	397	397
C3orf86	395	395
SERPINA1	394	394
HPCA	394	394
ARHGEF17	392	392
HP	391	391
PCK2	390	390
MYDGF	390	390
F10	388	388
CPPED1	386	386
PROC	385	385
FBLN1	385	385
SCAF11	384	384
EPS8L2	384	384
DEAF1	384	384
SEMA4G	382	382
IFNGR1	381	381
ZNF184	380	380
WNK4	380	380
C3	375	375
TINAGL1	374	374
CCDC68	374	374
SYNCRIP	373	373
IRF9	373	373
HRCT1	373	373
GRAMD1A	373	373
EPHX2	373	373
CYB5R3	373	373
SPINK1	372	372
MLLT10	372	372
TPRN	371	371
DPY19L4	370	370
RCAN1	369	369
NUCKS1	369	369
MST1	369	369
CRYGC	369	369
LMO7	368	368
ZNF341	367	367
ZC3H12D	365	365
RRP7A	365	365
MXRA8	365	365
LDLRAD4	365	365
SERPIND1	364	364
TCEA2	363	363
H4C3	363	363
TNFRSF12A	362	362
MASP2	362	362
OSBP2	361	361
NFAT5	361	361
ENTPD8	361	361
DCDC1	361	361
FGA	360	360
GRB7	358	358
FAM186A	358	358
SEMA4B	357	357
CMTM8	357	357
TRIM74	355	355
LIN54	355	355
NIPSNAP1	354	354
GSDMD	353	353
FBXW5	353	353
C8G	353	353
SLC25A45	352	352
SORT1	351	351
NFE2L2	351	351
BDH1	351	351
KIAA1217	349	349
GALK1	349	349
FOXN2	349	349
TUBG1	346	346
SELENOP	346	346
RETREG3	346	346
GDI2	345	345
PANK1	344	344
MTF2	343	343
IQGAP2	341	341
HADHB	341	341
HADHA	341	341
SH2B1	340	340
SEC23A	340	340
MGST2	339	339
LHFPL5	339	339
TMEM106B	338	338
THNSL1	338	338
SPHK1	338	338
RAP1GAP	338	338
S100A2	337	337
PCGF2	337	337
IGSF23	336	336
SLC30A1	334	334
SDE2	334	334
ANKRD13D	333	333
SP5	332	332
SERPINA11	332	332
CYP4F3	331	331
EPO	330	330
ZBED4	329	329
LIMS1	329	329
GAS2L3	327	327
SOD2	325	325
IDH1	325	325
DNAJA3	325	325
TUBGCP3	324	324
AQP11	324	324
SNAP25	323	323
MYH7	323	323
DENND5B	323	323
ANGPTL8	322	322
AIG1	322	322
MRPL38	321	321
CD99	321	321
ADGRG3	321	321
WDFY1	320	320
SLC35D1	320	320
CYP8B1	320	320
TMCO6	319	319
TMPRSS6	318	318
KRTAP3-1	318	318
DLC1	318	318
CPSF4L	318	318
PLOD2	317	317
AMT	316	316
IST1	315	315
PFDN4	314	314
APOC2	314	314
TRIP4	313	313
RNF19A	313	313
HGD	313	313
GPRC5C	313	313
PGC	312	312
MON1A	312	312
LLGL1	312	312
PFKFB4	310	310
OGDHL	310	310
TRIM50	309	309
DENND2B	309	309
ZNF101	308	308
NAT8	308	308
MAP2K3	308	308
NFKBIZ	307	307
GCKR	306	306
FABP1	305	305
BCAS1	305	305
TF	304	304
SSBP4	304	304
SPPL2A	304	304
HPS4	304	304
GSTO1	304	304
ETFB	304	304
ACY1	304	304
VOPP1	303	303
AMOTL2	303	303
STMN3	302	302
NT5C2	302	302
ACOT7	301	301
SP3	300	300
METTL7B	300	300
CES1	300	300
BLOC1S5	300	300
NDUFAF5	299	299
ESF1	299	299
NID1	298	298
KAT6A	298	298
GREB1	298	298
EPS8L3	298	298
SHC2	297	297
RFESD	297	297
RAVER1	296	296
GCFC2	296	296
GTF3C3	295	295
DRG2	295	295
BMF	295	295
MAPK13	294	294
HSPE1-MOB4	294	294
HSPE1	294	294
HSPD1	294	294
HAL	294	294
IL13RA1	292	292
CTDSP2	292	292
ATP1B1	292	292
ARSF	292	292
FTCDNL1	291	291
ABLIM1	291	291
TTI2	290	290
AMBP	290	290
MFF	289	289
METTL9	289	289
GIPC2	289	289
FAM53B	289	289
CREB3L3	289	289
CMTR2	289	289
GGT1	288	288
CMC1	288	288
ARMC5	288	288
SOCS5	287	287
IKBKG	287	287
MOB4	286	286
KPNA7	286	286
GCHFR	286	286
CYP3A43	286	286
LBX2	285	285
CYB5A	284	284
ZNF232	283	283
PRRT1	283	283
PPT2	283	283
INHBE	283	283
ATXN1	283	283
SST	282	282
ADGRG7	282	282
TBL1X	281	281
SLC5A9	281	281
S100A16	280	280
ZC3H6	279	279
RCOR3	279	279
STAT1	278	278
PHACTR4	278	278
NEU4	278	278
EHHADH	278	278
ZBTB4	277	277
POLR2A	277	277
VWA7	276	276
PCK1	276	276
MAN2C1	275	275
CYP4F11	275	275
ALDH3A2	275	275
PCNA	274	274
TRIM15	273	273
TANK	273	273
MPND	273	273
GSN	273	273
ANKRD65	273	273
RNF149	272	272
MOK	272	272
CCAR2	272	272
USP32	271	271
RAB42	271	271
UGT2B7	270	270
MSL2	270	270
UGT2A3	269	269
FNIP1	269	269
MCRIP1	267	267
TMEM98	265	265
CALML4	265	265
AK3	265	265
PALM2AKAP2	264	264
KIAA0232	264	264
HTT	264	264
CSTF1	264	264
AURKA	264	264
AJM1	264	264
RNF31	263	263
PSME2	263	263
IL11RA	263	263
ETFDH	263	263
C4orf46	263	263
METTL8	262	262
DCAF17	262	262
TCAF1	261	261
SLC2A4RG	261	261
MBD6	261	261
FRS2	261	261
DMTN	261	261
STX16	260	260
EIF5	260	260
BCL9L	260	260
TP53I3	259	259
F12	259	259
CNPPD1	259	259
ZNF76	258	258
SDCBP2	258	258
HBP1	258	258
ATXN7	258	258
RIN1	257	257
C17orf99	257	257
SLC22A7	256	256
SOWAHD	255	255
MRPL40	255	255
HIRA	255	255
CRLS1	255	255
SLC27A5	254	254
SAA4	254	254
OSMR	254	254
ITPK1	254	254
F11	254	254
ENPP7	254	254
MICU1	253	253
GSTK1	253	253
ENO1	253	253
CACFD1	252	252
ANKRD36C	252	252
TCEA1	251	251
NTSR2	251	251
IL32	251	251
GANAB	251	251
ARL5A	251	251
ACTR3	251	251
SLC16A3	250	250
SERPINA7	250	250
TUBG2	249	249
SLC25A13	249	249
PLXNB2	249	249
TYMP	248	248
SRRM3	248	248
SLC7A9	248	248
LAPTM4A	248	248
G6PC	248	248
CHST13	248	248
CDIP1	248	248
SLCO2B1	247	247
PET117	247	247
N4BP2L1	247	247
SUN2	246	246
PEX3	246	246
MARCHF8	246	246
GHRL	246	246
CCDC107	246	246
ADAT2	246	246
RIPPLY1	245	245
OPA1	245	245
YPEL3	243	243
RFFL	243	243
PAH	243	243
SAXO2	242	242
IPP	242	242
HES3	242	242
EFL1	242	242
DCAF10	242	242
MTHFR	241	241
FBXO44	241	241
FBXO2	241	241
CLCN6	241	241
CCL15	241	241
ALDOA	241	241
MAPK1IP1L	240	240
DNAJC22	240	240
ADD3	240	240
MAOB	239	239
DCP1A	239	239
MATN3	238	238
KIF16B	238	238
AGFG2	238	238
ZNF24	237	237
RFX7	237	237
PICALM	237	237
FANCL	237	237
AXL	237	237
VGF	236	236
SMLR1	236	236
SLC12A5	236	236
PPM1H	236	236
PDGFB	236	236
PDE11A	236	236
OAT	236	236
AP1AR	236	236
ADGRA1	236	236
ZFAND5	235	235
CCDC88A	235	235
ACSS1	235	235
ABCC3	235	235
SLC39A7	234	234
RXRB	234	234
HECTD1	234	234
TOMM20L	233	233
ID1	233	233
RPH3AL	232	232
NUBP1	232	232
MRPL21	232	232
IGHMBP2	232	232
BCL7C	232	232
SHH	231	231
PHF3	231	231
NHLRC1	231	231
MMAA	231	231
TIGD1	230	230
RTKN	230	230
RAD23B	230	230
PTPRN	230	230
PIPOX	230	230
FUS	230	230
EIF4E2	230	230
ZNF512B	229	229
TK1	229	229
SLC44A1	229	229
PWP1	229	229
PAOX	229	229
KLHDC7A	229	229
GBE1	229	229
DHRS4L2	229	229
C8B	229	229
AFMID	229	229
ZMYND8	228	228
UPP1	228	228
TGIF1	228	228
SLC25A5	228	228
PEX10	228	228
EIF6	228	228
NDE1	227	227
MARF1	227	227
KLF11	227	227
ACO1	227	227
DDC	226	226
C11orf91	226	226
PSMF1	225	225
LRP10	225	225
H4C12	225	225
EIF4EBP3	225	225
SCARB1	224	224
E2F3	224	224
DBI	224	224
CASS4	224	224
C2orf76	224	224
ACSM1	224	224
DDX1	223	223
C18orf21	223	223
BPIFB2	223	223
TMEM186	222	222
PMM2	222	222
MTHFD1L	222	222
HIC2	222	222
TVP23B	221	221
SYN3	221	221
OCEL1	221	221
IPO4	221	221
HPX	221	221
HES1	221	221
CHN2	221	221
SLC39A3	220	220
SLC26A1	220	220
PHF14	220	220
MYH7B	220	220
GSS	220	220
DIXDC1	220	220
ZNF787	219	219
ORAI1	219	219
NPM2	219	219
HEATR5A	218	218
CD74	218	218
SPATS2L	217	217
SKIV2L	217	217
NELFE	217	217
MAB21L4	217	217
CROT	217	217
UBA6	216	216
TMEM177	216	216
SLC38A5	216	216
SLC25A20	216	216
GRINA	216	216
COPS7B	216	216
ZNF696	215	215
PDHB	215	215
HMGN3	215	215
CUL7	215	215
C1QTNF6	215	215
UPF2	214	214
PCBP2	214	214
MEP1A	214	214
LACC1	214	214
CCDC122	214	214
ATP11A	214	214
MRPS31	213	213
LNPEP	213	213
ITIH3	213	213
GFI1B	213	213
CPT2	213	213
AS3MT	213	213
ZNF524	212	212
TMEM37	212	212
PPP1R3D	212	212
FIZ1	212	212
FAM227B	212	212
FAM217B	212	212
DTWD1	212	212
CPNE9	212	212
CPN2	212	212
CCZ1B	212	212
TAX1BP3	211	211
SMPDL3A	211	211
SERTAD2	211	211
SCAND1	211	211
HMGCS1	211	211
EMC6	211	211
ELP3	211	211
CHI3L2	211	211
C1RL	211	211
BAZ2A	211	211
ANLN	211	211
PTPRS	210	210
NOL7	210	210
NCOA3	210	210
ABAT	210	210
WTAP	209	209
SULT2A1	209	209
CCDC50	209	209
ZDHHC11	208	208
TTC39C	208	208
CAMK1	208	208
PNKP	207	207
LATS1	207	207
UNC80	206	206
N6AMT1	206	206
IFIT3	206	206
GTF2H2	206	206
CIC	206	206
TM9SF1	205	205
TBC1D22A	205	205
TACO1	205	205
SMAGP	205	205
RBP4	205	205
RANBP3	205	205
PGK1	205	205
OPA3	205	205
NOTCH2NLC	205	205
NOTCH2NLB	205	205
NOTCH2NLA	205	205
FBXW2	205	205
FBXL18	205	205
ZNF740	204	204
ZNF44	204	204
TCIM	204	204
STK4	204	204
OTUD7B	204	204
NUF2	204	204
LTV1	204	204
HNF4G	204	204
EXOC2	204	204
DUSP6	204	204
CSAD	204	204
CCNL1	204	204
ABCD3	204	204
WFIKKN1	203	203
USP14	203	203
SREBF1	203	203
PANK2	203	203
NDRG2	203	203
LTBR	203	203
AIFM2	203	203
ACACB	203	203
SVOP	202	202
PROS1	202	202
MMADHC	202	202
GJC2	202	202
EPB41L4B	202	202
DNAH14	202	202
CIDEC	202	202
C16orf70	202	202
ATXN2L	202	202
YWHAB	201	201
LRRC59	201	201
BRMS1L	201	201
BATF2	201	201
ARL6IP1	201	201
AP3S2	201	201
PSMG4	200	200
PARP4	200	200
ELF2	200	200
BAZ2B	200	200
ASPA	200	200
WWC2	199	199
TIMM13	199	199
SMARCD2	199	199
PRKACA	199	199
PIK3R3	199	199
LSM14B	199	199
INTS12	199	199
HOXA4	199	199
GSTCD	199	199
ARFGAP2	199	199
TAF3	198	198
PCCA	198	198
NSFL1C	198	198
NHEJ1	198	198
KPNB1	198	198
HINT2	198	198
GPR35	198	198
TSPAN4	197	197
SLCO2A1	197	197
PIKFYVE	197	197
NODAL	197	197
CES2	197	197
USP40	196	196
PLEKHM3	196	196
LDHA	196	196
IFRD1	196	196
HUS1	196	196
FOXJ3	196	196
CHRM4	196	196
ARL8B	196	196
ALKBH7	196	196
AKAP10	196	196
ORAI3	195	195
NAALAD2	195	195
MOV10L1	195	195
USP10	194	194
SMARCAD1	194	194
SERTAD3	194	194
PRAP1	194	194
LRRC75B	194	194
GNAI2	194	194
EIF2D	194	194
AMN	194	194
ZNF337	193	193
ZFAND2B	193	193
SLC22A23	193	193
SHF	193	193
RUVBL1	193	193
RANBP6	193	193
MTERF4	193	193
LYL1	193	193
EEFSEC	193	193
AFM	193	193
PTPN4	192	192
PINK1	192	192
LARS2	192	192
CTDP1	192	192
B3GNT2	192	192
RBSN	191	191
NUP62	191	191
LRRC61	191	191
IL4I1	191	191
G6PC3	191	191
DTD2	191	191
CSRP1	191	191
ATF5	191	191
AGXT	191	191
ACTR3C	191	191
TDP2	190	190
SERPINF2	190	190
RIN3	190	190
RHOH	190	190
PNPO	190	190
NUTF2	190	190
NAB2	190	190
KRAS	190	190
KDSR	190	190
CCDC92B	190	190
ACOT13	190	190
ZSCAN32	189	189
ZNF174	189	189
TXNIP	189	189
PCTP	189	189
MRPL2	189	189
KLC4	189	189
FUT10	189	189
EVI5	189	189
CRKL	189	189
COMMD2	189	189
CDK5RAP1	189	189
ASB9	189	189
ANK1	189	189
ZCCHC4	188	188
TMEM41A	188	188
TFDP2	188	188
TEN1	188	188
SKIDA1	188	188
C1orf115	188	188
ARHGEF12	188	188
ACOX1	188	188
UBE2D3	187	187
SLC35A3	187	187
HDAC2	187	187
COX20	187	187
USPL1	186	186
THPO	186	186
SRSF11	186	186
PTK2B	186	186
LRRC40	186	186
HMGB1	186	186
HIBCH	186	186
ERBB3	186	186
ART5	186	186
ZNF638	185	185
UBE2Q1	185	185
SCFD1	185	185
SCAP	185	185
PRODH2	185	185
PRICKLE4	185	185
OAZ2	185	185
NXT1	185	185
NUDCD1	185	185
FRS3	185	185
DR1	185	185
ZNF343	184	184
ZNF292	184	184
USP54	184	184
TXNDC11	184	184
RPS7	184	184
MRPS18C	184	184
LZTS3	184	184
HSD17B4	184	184
HELQ	184	184
C1orf210	184	184
UGT2B4	183	183
NECAB3	183	183
MGAT1	183	183
MFN2	183	183
GPT2	183	183
GLT8D1	183	183
DDX19B	183	183
ARHGAP24	183	183
ACADM	183	183
ZNF69	182	182
TOMM22	182	182
TNRC6B	182	182
SLC10A5	182	182
RSPH3	182	182
RPS15	182	182
MRPL4	182	182
FCHO2	182	182
DHRS4L1	182	182
TRIQK	181	181
SCRN3	181	181
NR1H3	181	181
METAP1D	181	181
MED23	181	181
HBS1L	181	181
FOXQ1	181	181
EPM2A	181	181
DHRS4	181	181
CIR1	181	181
CCNT2	181	181
AKIRIN1	181	181
ZNRF1	180	180
TCFL5	180	180
SVIL	180	180
REP15	180	180
POLE4	180	180
PLK3	180	180
GOLGA1	180	180
SEC16B	179	179
RNF38	179	179
RDH14	179	179
RAD54L2	179	179
PDZK1	179	179
MAP3K11	179	179
IL6R	179	179
FUCA2	179	179
FAM107B	179	179
ENC1	179	179
CPB2	179	179
ZBTB45	178	178
USP9X	178	178
TMEM9	178	178
NDUFS7	178	178
MSLN	178	178
HNRNPA3	178	178
HEXB	178	178
SORBS2	177	177
SOAT2	177	177
SLC12A4	177	177
SLBP	177	177
PWWP2B	177	177
PCYT1B	177	177
MFSD5	177	177
KCNMB3	177	177
INO80	177	177
GXYLT1	177	177
FTCD	177	177
DECR1	177	177
DAAM1	177	177
BCL2L11	177	177
RABGGTA	176	176
PTPRG	176	176
NPPB	176	176
MCOLN1	176	176
LFNG	176	176
ASXL1	176	176
PRKRA	175	175
PJVK	175	175
PARD6A	175	175
MARCHF7	175	175
KCNAB2	175	175
ACD	175	175
WDR31	174	174
TRIM13	174	174
STT3B	174	174
MRPS15	174	174
MRGPRX3	174	174
MDM4	174	174
LSM2	174	174
FAM43B	174	174
EZH1	174	174
CDK4	174	174
CCNI	174	174
ZBTB37	173	173
VTA1	173	173
TRIP12	173	173
SSTR5	173	173
NMBR	173	173
MIA3	173	173
G2E3	173	173
FBXO36	173	173
DCLRE1C	173	173
CAMSAP3	173	173
ZC2HC1C	172	172
WFDC3	172	172
VARS2	172	172
TMEM184A	172	172
PRR19	172	172
PAFAH1B3	172	172
HIBADH	172	172
DNTTIP1	172	172
CHD3	172	172
ACYP1	172	172
TJP2	171	171
SLC25A36	171	171
SLC19A2	171	171
RBCK1	171	171
PRELID2	171	171
GTF2A1	171	171
COPS8	171	171
BIRC6	171	171
PTGR2	170	170
PRKN	170	170
PACRG	170	170
GZF1	170	170
DUS2	170	170
DDX28	170	170
CDKN1A	170	170
ZNF837	169	169
THBS3	169	169
SGK2	169	169
MTX1	169	169
IL4R	169	169
HELZ	169	169
HDAC4	169	169
FAM76B	169	169
CEP57	169	169
CEP170B	169	169
CAPG	169	169
BRIP1	169	169
USP15	168	168
SNRPB	168	168
PEF1	168	168
JUNB	168	168
HIPK1	168	168
GPN3	168	168
FAM216A	168	168
CHD1	168	168
ANTXR2	168	168
ZNF326	167	167
YWHAG	167	167
YARS1	167	167
UNC50	167	167
TXNDC5	167	167
TINF2	167	167
SLC7A6OS	167	167
S100PBP	167	167
RABL2B	167	167
PSMD3	167	167
PRMT7	167	167
PHKA2	167	167
MXRA7	167	167
IFT88	167	167
GSPT1	167	167
COA5	167	167
TOR4A	166	166
THRAP3	166	166
SLC35E2A	166	166
RBP5	166	166
NOC3L	166	166
KIAA2026	166	166
GALNT2	166	166
DHRS11	166	166
CPHXL	166	166
BIRC7	166	166
ACOT1	166	166
VDAC2	165	165
SSBP1	165	165
SOS1	165	165
SMIM6	165	165
RABGEF1	165	165
PDE4DIP	165	165
NIBAN2	165	165
HM13	165	165
GDF5	165	165
FOXA2	165	165
CEP250	165	165
CALD1	165	165
BRPF1	165	165
AFG3L2	165	165
ACAD9	165	165
USP34	164	164
UROC1	164	164
TGIF2	164	164
SLC5A11	164	164
PPM1D	164	164
EVA1B	164	164
DNAJC11	164	164
VRK2	163	163
TNS1	163	163
SNX27	163	163
H4C15	163	163
H4C14	163	163
GTF2H2C_2	163	163
GTF2H2C	163	163
GABARAPL1	163	163
DCLRE1B	163	163
CHRNB2	163	163
AP4B1	163	163
ACYP2	163	163
UTP4	162	162
TUBB4B	162	162
TCAF2	162	162
TBCCD1	162	162
SYP	162	162
PRXL2A	162	162
PELO	162	162
NRDC	162	162
NCBP3	162	162
MTRES1	162	162
ITGA1	162	162
FANCE	162	162
DHRS3	162	162
DERPC	162	162
COPS4	162	162
CHTF8	162	162
CAMKK2	162	162
AKR1C3	162	162
SNX16	161	161
FAM53C	161	161
FAAP20	161	161
EBI3	161	161
DUS1L	161	161
CDC25C	161	161
C6orf136	161	161
ZCCHC7	160	160
SNX5	160	160
SEZ6	160	160
NUP214	160	160
MGME1	160	160
LOX	160	160
DRAP1	160	160
C2CD2	160	160
C11orf68	160	160
BCAR1	160	160
ARL2BP	160	160
ALDOC	160	160
ZSCAN26	159	159
TOB2	159	159
TMEM242	159	159
SIRT5	159	159
PRMT5	159	159
PMS2	159	159
PKIG	159	159
NEK7	159	159
KATNA1	159	159
HGFAC	159	159
FBXL20	159	159
AIMP2	159	159
WTIP	158	158
UFL1	158	158
TMX4	158	158
TMEM140	158	158
TFF3	158	158
RAB5A	158	158
MIPOL1	158	158
GYG2	158	158
EFHB	158	158
TAB1	157	157
SH3TC1	157	157
PIF1	157	157
CNP	157	157
ZNF354B	156	156
ZFP1	156	156
TRAF4	156	156
THEM4	156	156
TCAIM	156	156
SEPSECS	156	156
MYL12B	156	156
EXD2	156	156
ERMARD	156	156
ERCC6L2	156	156
ENPP1	156	156
EBAG9	156	156
DCP1B	156	156
ASPDH	156	156
ANO6	156	156
AHI1	156	156
UBE2Q2L	155	155
TTPAL	155	155
TMEM256	155	155
SLC19A3	155	155
RBM42	155	155
RBM28	155	155
POLDIP3	155	155
NMNAT1	155	155
NELFCD	155	155
LZIC	155	155
KAT5	155	155
GDAP1	155	155
FCHSD2	155	155
EIF4A1	155	155
C8orf33	155	155
ANKEF1	155	155
STK19	154	154
SNRPC	154	154
SAR1B	154	154
PKN2	154	154
NCOA7	154	154
NAPG	154	154
MBNL1	154	154
LTBP3	154	154
LRP1	154	154
LAMP1	154	154
ITGAV	154	154
GDAP1L1	154	154
FZD5	154	154
FITM2	154	154
DXO	154	154
DISC1	154	154
COX17	154	154
CBWD5	154	154
CBWD3	154	154
ATP5MC3	154	154
ARHGEF16	154	154
ABHD16A	154	154
ZGPAT	153	153
TMEM86B	153	153
TIGD2	153	153
RBM25	153	153
NBPF1	153	153
MLX	153	153
LGALS3BP	153	153
ISG20	153	153
DSTN	153	153
DIAPH1	153	153
CLTC	153	153
CLK1	153	153
C4BPA	153	153
BFSP1	153	153
ARFRP1	153	153
ADSL	153	153
ZBTB40	152	152
SYS1	152	152
STX18	152	152
SMIM11B	152	152
SMIM11A	152	152
RB1CC1	152	152
PRLR	152	152
PDCD6IP	152	152
MIXL1	152	152
MEMO1	152	152
KDM3A	152	152
IGF2BP1	152	152
DRC7	152	152
CYP27A1	152	152
AURKAIP1	152	152
ATP5F1E	152	152
ZNF441	151	151
SLC22A18AS	151	151
SLC22A18	151	151
RAD50	151	151
PRRT1B	151	151
NDUFA6	151	151
NAA20	151	151
KANK2	151	151
CTSH	151	151
CHKA	151	151
UIMC1	150	150
TMEM101	150	150
ST3GAL2	150	150
RESF1	150	150
MTHFD2L	150	150
MAP2K7	150	150
GOT2	150	150
BARD1	150	150
TRIB3	149	149
TOP3B	149	149
PTGDR2	149	149
PPP2R5C	149	149
PCMT1	149	149
TRUB1	148	148
SERPINC1	148	148
RMND1	148	148
RANBP2	148	148
PNRC1	148	148
PIK3C2B	148	148
PHF13	148	148
PDXP	148	148
MRPS23	148	148
CSNK1A1	148	148
CPVL	148	148
C3orf33	148	148
C20orf27	148	148
ARMT1	148	148
AGK	148	148
ACSL3	148	148
TRIM44	147	147
TMEM39B	147	147
TMEM127	147	147
REXO4	147	147
MANSC1	147	147
CYP19A1	147	147
CIAO1	147	147
CCNC	147	147
ANKRD1	147	147
TEF	146	146
TEAD2	146	146
TAF6L	146	146
RPL22L1	146	146
NABP1	146	146
IRF2	146	146
GNAT2	146	146
FANCD2	146	146
CYREN	146	146
CNTNAP1	146	146
CEP295	146	146
CCR10	146	146
APOF	146	146
AMPD2	146	146
USP42	145	145
TCTEX1D4	145	145
SPAST	145	145
SLC41A3	145	145
SETBP1	145	145
NRBP1	145	145
MIEN1	145	145
LYZ	145	145
KIAA1958	145	145
GTF2H4	145	145
GAB1	145	145
FLOT1	145	145
EFCAB7	145	145
CLDN15	145	145
CD55	145	145
C9orf147	145	145
BTBD19	145	145
ACSL5	145	145
YTHDF2	144	144
WDR90	144	144
TVP23C	144	144
POLR3E	144	144
PGBD2	144	144
PAQR9	144	144
NME1	144	144
MRPL58	144	144
MRPL48	144	144
MRPL20	144	144
EMP2	144	144
CTNNB1	144	144
C1orf53	144	144
AP1G2	144	144
ADAM17	144	144
UEVLD	143	143
TOP1MT	143	143
SSR3	143	143
SLC22A3	143	143
SIX5	143	143
R3HCC1	143	143
PNKD	143	143
PEX5	143	143
MSRB2	143	143
METAP2	143	143
HDAC1	143	143
FAM210B	143	143
EEF1AKMT2	143	143
EAPP	143	143
DNA2	143	143
CDCA7	143	143
C12orf73	143	143
ATAD2	143	143
ASH2L	143	143
ACSL1	143	143
WDR93	142	142
TNFSF4	142	142
TLX2	142	142
SIL1	142	142
RWDD1	142	142
RPL31	142	142
POC1A	142	142
PEX11A	142	142
PCID2	142	142
PCBP4	142	142
NTMT1	142	142
MSANTD2	142	142
MLLT11	142	142
KIF13B	142	142
FAM133B	142	142
ELMO1	142	142
DNAJC10	142	142
CUL4A	142	142
CETN3	142	142
CDC42SE1	142	142
WEE1	141	141
VPS28	141	141
TYMSOS	141	141
TYMS	141	141
TMEM14C	141	141
TCP11L2	141	141
TCF12	141	141
PDE4D	141	141
NHP2	141	141
MYO7A	141	141
MRTO4	141	141
EMC1	141	141
CREBL2	141	141
ZFAND6	140	140
ZFAND3	140	140
VPS26C	140	140
TSN	140	140
TFRC	140	140
SIRT3	140	140
RBM45	140	140
PSMD7	140	140
PSMD13	140	140
PPP1R9A	140	140
PPAT	140	140
PIP4P2	140	140
PAICS	140	140
PABPN1	140	140
MRPL39	140	140
MMP24	140	140
LIG3	140	140
IDH3A	140	140
DHTKD1	140	140
CHST15	140	140
BRD2	140	140
ANKRD36	140	140
VAX2	139	139
UTP11	139	139
SH3BGRL2	139	139
RBM12	139	139
PNPT1	139	139
NDUFS3	139	139
NDUFC2-KCTD14	139	139
NDUFC2	139	139
MTARC1	139	139
KBTBD4	139	139
IKZF4	139	139
HEBP2	139	139
GTF2IRD2	139	139
ENOSF1	139	139
DICER1	139	139
C6orf226	139	139
BCL2L2-PABPN1	139	139
BCL2L2	139	139
ZNF862	138	138
ZNF816-ZNF321P	138	138
ZNF816	138	138
ZNF425	138	138
ZNF398	138	138
STK35	138	138
SPG11	138	138
SF3A3	138	138
SECISBP2	138	138
RPL36AL	138	138
POLR2C	138	138
PIWIL2	138	138
NET1	138	138
MGAT2	138	138
CBWD2	138	138
CALM1	138	138
ABTB2	138	138
ZNF410	137	137
TAOK3	137	137
SIRT1	137	137
SH3PXD2A	137	137
SFT2D3	137	137
NIPSNAP2	137	137
FGD4	137	137
FAM83D	137	137
ENGASE	137	137
EIF4ENIF1	137	137
ECI1	137	137
DNAJC16	137	137
CNPY3	137	137
CFL2	137	137
ATXN7L1	137	137
ZNF335	136	136
ZNF165	136	136
UGP2	136	136
TEX10	136	136
SRP54	136	136
SPIDR	136	136
SMIM26	136	136
SERPINB9	136	136
RMDN2	136	136
PSPH	136	136
PPCDC	136	136
PHLDB2	136	136
MTIF2	136	136
KLF16	136	136
INSR	136	136
IKZF3	136	136
GIGYF1	136	136
FBXO33	136	136
DSC2	136	136
CCT6A	136	136
WASHC2A	135	135
SPAG16	135	135
SF3B5	135	135
RUSF1	135	135
RNF146	135	135
RFXANK	135	135
PTDSS1	135	135
PGRMC2	135	135
NFYC	135	135
MTERF3	135	135
KDELR1	135	135
KANK1	135	135
IGF2BP2	135	135
GSR	135	135
GDPGP1	135	135
CIB1	135	135
CD164	135	135
BORCS8	135	135
ARHGAP27	135	135
ZNF799	134	134
XRN2	134	134
UGDH	134	134
TSC22D4	134	134
TOB1	134	134
TMEM114	134	134
SHPRH	134	134
PDE4C	134	134
MDC1	134	134
MAT2A	134	134
KMT2D	134	134
JADE1	134	134
HEXIM2	134	134
ESRRA	134	134
DDX59	134	134
CARMIL1	134	134
C17orf75	134	134
ATP5IF1	134	134
SNF8	133	133
SLC35D2	133	133
SHOC2	133	133
SEZ6L2	133	133
RSRC1	133	133
RPIA	133	133
MRPL15	133	133
MAZ	133	133
KIAA0895L	133	133
ITGB1	133	133
IMPA2	133	133
GMCL1	133	133
GEMIN5	133	133
GALM	133	133
EPS8	133	133
EMC9	133	133
ELK4	133	133
CYLD	133	133
COMMD6	133	133
CHD8	133	133
CDHR2	133	133
BIRC2	133	133
BBIP1	133	133
ASPHD1	133	133
ZNF397	132	132
TM2D3	132	132
SURF6	132	132
SSC4D	132	132
SMIM14	132	132
SLC30A4	132	132
PPP1R3C	132	132
POLR2J3	132	132
NOP14	132	132
NEDD9	132	132
MED31	132	132
MAPKBP1	132	132
LMF1	132	132
KIZ	132	132
GRK4	132	132
GINS1	132	132
GID8	132	132
DIDO1	132	132
COQ7	132	132
CLSPN	132	132
CCN2	132	132
C17orf100	132	132
ATP6V0D1	132	132
ASXL2	132	132
ARPC4-TTLL3	132	132
ARPC4	132	132
ZNF827	131	131
SRSF5	131	131
SPATA1	131	131
SLC7A6	131	131
SLC25A28	131	131
SAXO1	131	131
RRAGA	131	131
RPS3A	131	131
RNF128	131	131
RECQL4	131	131
PRKCZ	131	131
PIGF	131	131
NCOA5	131	131
NBR1	131	131
MTMR4	131	131
MLST8	131	131
MINDY2	131	131
LRRC14	131	131
KCNB1	131	131
IBTK	131	131
EGLN2	131	131
DEPP1	131	131
CRIPT	131	131
CD63	131	131
CASC3	131	131
ATF7IP	131	131
ABCC2	131	131
WASHC2C	130	130
TBC1D30	130	130
STAG2	130	130
SLC22A11	130	130
SIK2	130	130
SH3TC2	130	130
RBBP5	130	130
NAAA	130	130
MRPS5	130	130
MAGI1	130	130
LRP6	130	130
ITGB5	130	130
HS3ST2	130	130
GNS	130	130
FAM177A1	130	130
CYP7A1	130	130
AIF1	130	130
ZNF408	129	129
TMEM14A	129	129
TBPL1	129	129
STEAP2	129	129
SLC25A46	129	129
RPS15A	129	129
RNF6	129	129
RNF186	129	129
PAQR4	129	129
NUFIP2	129	129
NR1D1	129	129
NPM1	129	129
LRP2BP	129	129
KRTAP10-12	129	129
FAM149B1	129	129
ECD	129	129
DENND4B	129	129
CENPT	129	129
CDK6	129	129
ARHGAP1	129	129
ANKRD37	129	129
ADK	129	129
ZNF600	128	128
UMPS	128	128
TRMO	128	128
TEFM	128	128
STEAP1	128	128
SPNS1	128	128
SNX30	128	128
SNX13	128	128
SLC17A5	128	128
RP9	128	128
PYURF	128	128
PLD1	128	128
PIGY	128	128
PAFAH1B2	128	128
NUP107	128	128
MYLK3	128	128
LAMTOR5	128	128
KHDRBS1	128	128
HERC3	128	128
DSTYK	128	128
DNAJB12	128	128
C6orf89	128	128
BUD13	128	128
ALKBH5	128	128
ZKSCAN2	127	127
TRMU	127	127
SRSF2	127	127
SPRYD4	127	127
RSL1D1	127	127
PSME3	127	127
PRDX3	127	127
PHGDH	127	127
MRRF	127	127
MFSD11	127	127
MAD2L1BP	127	127
LENG9	127	127
HINT3	127	127
GTPBP2	127	127
FAM8A1	127	127
EEF1AKMT1	127	127
CEP135	127	127
B3GAT3	127	127
ZNF589	126	126
ZNF57	126	126
ZNF181	126	126
WAC	126	126
THUMPD3	126	126
SMG1	126	126
SDHAF4	126	126
RBBP9	126	126
RARS1	126	126
PRDX1	126	126
NDUFAB1	126	126
KDM8	126	126
IDE	126	126
HMGA1	126	126
HDDC2	126	126
GNE	126	126
FUT8	126	126
COPS6	126	126
CHD9	126	126
CCDC43	126	126
CCDC171	126	126
ATAD2B	126	126
UBQLN1	125	125
TMEM120A	125	125
TMBIM6	125	125
TIGD4	125	125
TEX22	125	125
TASOR2	125	125
TAF9	125	125
STK11IP	125	125
STARD4	125	125
SLC24A1	125	125
SEC62	125	125
RAD17	125	125
PYGB	125	125
PRDX2	125	125
NUDT15	125	125
NINJ1	125	125
C9orf64	125	125
ARFIP1	125	125
AK6	125	125
ACTRT3	125	125
ACAT2	125	125
TMEM14B	124	124
TGFBR3	124	124
RPL27	124	124
PLAA	124	124
PITX1	124	124
PHF10	124	124
PEX2	124	124
PERCC1	124	124
NUP210	124	124
NEDD1	124	124
IFT74	124	124
IDH3B	124	124
GSTA4	124	124
FRG1	124	124
FERMT1	124	124
EGR1	124	124
DUSP3	124	124
DDIT4	124	124
CLN8	124	124
CCS	124	124
CCDC87	124	124
ATXN1L	124	124
ZNF761	123	123
ZNF3	123	123
TTC6	123	123
TMEM87B	123	123
SLC35C2	123	123
RPL22	123	123
RIF1	123	123
PPIL4	123	123
PLS1	123	123
KDM1A	123	123
JAG1	123	123
H1-4	123	123
GNG5	123	123
FOXA1	123	123
FAM168A	123	123
ESCO1	123	123
CCDC130	123	123
ZNF846	122	122
WASL	122	122
TTC23L	122	122
TSGA10	122	122
TPD52L2	122	122
NDUFV1	122	122
NACA	122	122
MRPL53	122	122
MRPL45	122	122
MAML3	122	122
LSM5	122	122
LIPT1	122	122
ITPRIPL2	122	122
DYM	122	122
DTNBP1	122	122
AVL9	122	122
AAR2	122	122
WDR78	121	121
WDR48	121	121
UCHL5	121	121
SYT1	121	121
SRSF4	121	121
SLC9B1	121	121
SCN9A	121	121
SCN11A	121	121
RO60	121	121
PSMD14	121	121
PSMC4	121	121
PSMA6	121	121
PPP6R1	121	121
PPL	121	121
PFKFB1	121	121
NUP54	121	121
NDRG1	121	121
MTX2	121	121
MIER1	121	121
MAF1	121	121
LPCAT3	121	121
KRT19	121	121
GRB2	121	121
GOLPH3	121	121
GALE	121	121
FAM151B	121	121
ESYT3	121	121
EEF1AKMT4-ECE2	121	121
EEF1AKMT4	121	121
DNAJC6	121	121
CREBRF	121	121
CITED2	121	121
ATP5PD	121	121
ALG3	121	121
ADPGK	121	121
UBE2Z	120	120
TXNDC15	120	120
TRMT2A	120	120
TRAPPC12	120	120
TIMM23	120	120
SRP68	120	120
SLC34A3	120	120
SGPP1	120	120
RANBP1	120	120
PDE8A	120	120
OSBPL7	120	120
NR1I3	120	120
LONP2	120	120
LARGE2	120	120
FAM136A	120	120
ETFA	120	120
CYP20A1	120	120
CNOT8	120	120
CHMP6	120	120
CCNT1	120	120
CBFA2T2	120	120
ARL14EP	120	120
ABCC11	120	120
YTHDF1	119	119
TXNDC9	119	119
TSG101	119	119
TM2D1	119	119
THUMPD1	119	119
SRSF1	119	119
SNX3	119	119
SMC3	119	119
SLF2	119	119
RHOBTB2	119	119
RGPD8	119	119
RGPD5	119	119
REL	119	119
PRDM10	119	119
NOL11	119	119
NFE2L1	119	119
MVK	119	119
IMMT	119	119
GORASP2	119	119
GMEB2	119	119
EIF5B	119	119
AVPI1	119	119
ABCF3	119	119
ZNF8	118	118
ZNF180	118	118
ZCWPW1	118	118
WDR36	118	118
STBD1	118	118
RNF138	118	118
PTCD2	118	118
PARP9	118	118
NUP153	118	118
NUDT19	118	118
NAGLU	118	118
MYORG	118	118
MRPS27	118	118
MEPCE	118	118
ITGB1BP1	118	118
HSP90AB1	118	118
HNRNPH1	118	118
GUSB	118	118
GTPBP10	118	118
GSE1	118	118
EFCAB2	118	118
DTX3L	118	118
DRAM1	118	118
CREM	118	118
CPSF3	118	118
CCN5	118	118
AP5S1	118	118
ZC3H15	117	117
VPS51	117	117
UBAP2L	117	117
U2SURP	117	117
TCTN3	117	117
SMARCE1	117	117
SLC39A13	117	117
SLC25A21	117	117
SKA1	117	117
PYROXD1	117	117
PSMA1	117	117
PLTP	117	117
PDE3B	117	117
NDUFAF6	117	117
MRPS35	117	117
MICU2	117	117
MAPK8	117	117
IL15RA	117	117
GPHA2	117	117
GPBP1	117	117
GLIS2	117	117
FUT6	117	117
DNAJA2	117	117
CRNKL1	117	117
CFAP61	117	117
C1orf43	117	117
ARIH1	117	117
ZNF853	116	116
ZNF501	116	116
ZNF443	116	116
WDR12	116	116
UNKL	116	116
TTC30B	116	116
SPOP	116	116
SNUPN	116	116
SNRPD1	116	116
SNAI1	116	116
SLC39A6	116	116
SETD2	116	116
SDC1	116	116
RBL1	116	116
NSUN6	116	116
MARVELD2	116	116
LMAN1	116	116
LEMD3	116	116
KLHDC4	116	116
ENDOV	116	116
ELP2	116	116
CCNG2	116	116
CCDC142	116	116
CARF	116	116
BRWD1	116	116
ARL5B	116	116
ZNF497	115	115
ZNF248	115	115
ZCWPW2	115	115
VPS16	115	115
TRIM37	115	115
TMEM123	115	115
TLE6	115	115
TBCD	115	115
SNRNP48	115	115
SERPINB6	115	115
RORC	115	115
PLEC	115	115
PCED1A	115	115
PABPC1	115	115
NFIA	115	115
NDST2	115	115
HSD3B7	115	115
EIF2AK3	115	115
DNAJB2	115	115
CDC73	115	115
C2orf88	115	115
AZI2	115	115
[truncated: 373 more rows]
